# Supplementary material for: Comparison of Virulence-Factor-Encoding Genes and Genotype Distribution amongst Clinical Pseudomonas aeruginosa Strains
Source: MDPI journal article supplement (doi:10.3390/ijms24021269), 2023-01-09
Supplement: s1 [file s1]

# Comparison of virulence factor-encoding genes and genotypes distribution amongst clinical *Pseudomonas aeruginosa* strains

Tomasz Bogiel<sup>1\*</sup>, Dagmara Depka<sup>1</sup>, Stanisław Kruszewski<sup>2</sup>, Adrianna Rutkowska<sup>3</sup>, Piotr Kanarek<sup>4</sup>, Mateusz Rzepka<sup>1</sup>, Jorge H Leitão<sup>5\*</sup>, Aleksander Deptuła<sup>6</sup> and Eugenia Gospodarek-Komkowska<sup>1</sup>

<sup>1</sup> Microbiology Department, Ludwik Rydygier Collegium Medicum in Bydgoszcz, Nicolaus Copernicus University in Toruń, 85-094 Bydgoszcz, Poland and Clinical Microbiology Laboratory, doctor Antoni Jurasz University Hospital No. 1 in Bydgoszcz, Poland

<sup>2</sup> Institute of Forensic Genetics Ltd., Bydgoszcz, Poland

<sup>3</sup> Medicover Integrated Clinical Services, Bydgoszcz, Poland

<sup>4</sup> Department of Microbiology and Food Technology, Faculty of Agriculture and Biotechnology, Bydgoszcz University of Science and Technology, Bydgoszcz, Poland

<sup>5</sup> Department of Bioengineering, IBB-Institute for Bioengineering and Biosciences, Instituto Superior Técnico, Universidade de Lisboa, Av. Rovisco Pais, 1049-001 Lisboa, Portugal. Associate Laboratory, i4HB-Institute for Health and Bioeconomy, Instituto Superior Técnico, Universidade de Lisboa, Av. Rovisco Pais, 1049-001 Lisboa, Portugal

<sup>6</sup> Department of Propaedeutics of Medicine and Infection Prevention, Ludwik Rydygier Collegium Medicum in Bydgoszcz, Nicolaus Copernicus University in Toruń, 85-094 Bydgoszcz, Poland

\* Correspondence (T.B.): e-mail: t.bogiel@cm.umk.pl, telephone number: +48 52 585 44 80, (J.H.L.): e-mail: jorgeleitao@tecnico.ulisboa.pt, telephone number: +351 218417688

**Table S1.** Distribution of the genes and genotypes with respect to antimicrobial susceptibility profiles of the multidrug-sensitive *P. aeruginosa* strains included in the study ( $n = 74$ ).

| Strain number ( $n = 74$ ) | <i>lasB</i> | <i>pLC N</i> | <i>pLC H</i> | <i>exoU</i> | <i>nan1</i> | <i>pilA</i> | <i>pilB</i> | Genotype | <i>n</i> | %    |
|----------------------------|-------------|--------------|--------------|-------------|-------------|-------------|-------------|----------|----------|------|
| 11                         | +           | +            | +            | +           | +           | -           | +           | I-S      | 1        | 1.4  |
| 8                          | +           | +            | +            | +           | +           | -           | -           | II-S     | 10       | 13.5 |
| 14                         | +           | +            | +            | +           | +           | -           | -           |          |          |      |
| 32                         | +           | +            | +            | +           | +           | -           | -           |          |          |      |
| 38                         | +           | +            | +            | +           | +           | -           | -           |          |          |      |
| 59                         | +           | +            | +            | +           | +           | -           | -           |          |          |      |
| 62                         | +           | +            | +            | +           | +           | -           | -           |          |          |      |
| 64                         | +           | +            | +            | +           | +           | -           | -           |          |          |      |
| 66                         | +           | +            | +            | +           | +           | -           | -           |          |          |      |
| 72                         | +           | +            | +            | +           | +           | -           | -           |          |          |      |
| 73                         | +           | +            | +            | +           | +           | -           | -           |          |          |      |
| 12                         | +           | +            | +            | +           | -           | -           | -           | III-S    | 15       | 20.3 |
| 23                         | +           | +            | +            | +           | -           | -           | -           |          |          |      |
| 26                         | +           | +            | +            | +           | -           | -           | -           |          |          |      |
| 27                         | +           | +            | +            | +           | -           | -           | -           |          |          |      |
| 29                         | +           | +            | +            | +           | -           | -           | -           |          |          |      |
| 36                         | +           | +            | +            | +           | -           | -           | -           |          |          |      |
| 47                         | +           | +            | +            | +           | -           | -           | -           |          |          |      |
| 49                         | +           | +            | +            | +           | -           | -           | -           |          |          |      |
| 50                         | +           | +            | +            | +           | -           | -           | -           |          |          |      |
| 55                         | +           | +            | +            | +           | -           | -           | -           |          |          |      |
| 57                         | +           | +            | +            | +           | -           | -           | -           |          |          |      |
| 58                         | +           | +            | +            | +           | -           | -           | -           |          |          |      |
| 70                         | +           | +            | +            | +           | -           | -           | -           |          |          |      |
| 80                         | +           | +            | +            | +           | -           | -           | -           |          |          |      |
| 83                         | +           | +            | +            | +           | -           | -           | -           |          |          |      |
| 63                         | +           | +            | +            | -           | +           | +           | -           | IV-S     | 1        | 1.4  |
| 42                         | +           | +            | +            | -           | +           | -           | -           | V-S      | 6        | 8.1  |
| 75                         | +           | +            | +            | -           | +           | -           | -           |          |          |      |
| 44                         | +           | +            | +            | -           | +           | -           | -           |          |          |      |
| 52                         | +           | +            | +            | -           | +           | -           | -           |          |          |      |
| 60                         | +           | +            | +            | -           | +           | -           | -           |          |          |      |
| 65                         | +           | +            | +            | -           | +           | -           | -           |          |          |      |
| 25                         | +           | +            | +            | -           | -           | +           | -           | VI-S     | 2        | 2.7  |
| 31                         | +           | +            | +            | -           | -           | +           | -           |          |          |      |
| 3                          | +           | +            | +            | -           | -           | -           | -           | VII-S    | 22       | 29.7 |
| 13                         | +           | +            | +            | -           | -           | -           | -           |          |          |      |
| 16                         | +           | +            | +            | -           | -           | -           | -           |          |          |      |
| 18                         | +           | +            | +            | -           | -           | -           | -           |          |          |      |
| 19                         | +           | +            | +            | -           | -           | -           | -           |          |          |      |
| 24                         | +           | +            | +            | -           | -           | -           | -           |          |          |      |
| 28                         | +           | +            | +            | -           | -           | -           | -           |          |          |      |
| 30                         | +           | +            | +            | -           | -           | -           | -           |          |          |      |
| 33                         | +           | +            | +            | -           | -           | -           | -           |          |          |      |
| 34                         | +           | +            | +            | -           | -           | -           | -           |          |          |      |
| 37                         | +           | +            | +            | -           | -           | -           | -           |          |          |      |
| 40                         | +           | +            | +            | -           | -           | -           | -           |          |          |      |

|                                                                                     |      |      |      |      |      |     |     |         |   |     |  |
|-------------------------------------------------------------------------------------|------|------|------|------|------|-----|-----|---------|---|-----|--|
| 41                                                                                  | +    | +    | +    | -    | -    | -   | -   |         |   |     |  |
| 48                                                                                  | +    | +    | +    | -    | -    | -   | -   |         |   |     |  |
| 51                                                                                  | +    | +    | +    | -    | -    | -   | -   |         |   |     |  |
| 53                                                                                  | +    | +    | +    | -    | -    | -   | -   |         |   |     |  |
| 61                                                                                  | +    | +    | +    | -    | -    | -   | -   |         |   |     |  |
| 67                                                                                  | +    | +    | +    | -    | -    | -   | -   |         |   |     |  |
| 71                                                                                  | +    | +    | +    | -    | -    | -   | -   |         |   |     |  |
| 76                                                                                  | +    | +    | +    | -    | -    | -   | -   |         |   |     |  |
| 79                                                                                  | +    | +    | +    | -    | -    | -   | -   |         |   |     |  |
| 81                                                                                  | +    | +    | +    | -    | -    | -   | -   |         |   |     |  |
| 20                                                                                  | +    | +    | -    | +    | +    | -   | -   | VIII-S  | 1 | 1.4 |  |
| 43                                                                                  | +    | +    | -    | +    | -    | -   | -   | IX-S    | 2 | 2.7 |  |
| 85                                                                                  | +    | +    | -    | +    | -    | -   | -   |         |   |     |  |
| 46                                                                                  | +    | -    | +    | +    | +    | -   | -   | X-S     | 2 | 2.7 |  |
| 78                                                                                  | +    | -    | +    | +    | +    | -   | -   |         |   |     |  |
| 84                                                                                  | +    | -    | +    | +    | -    | -   | -   | XI-S    | 1 | 1.4 |  |
| 77                                                                                  | +    | -    | +    | -    | +    | +   | -   | XII-S   | 1 | 1.4 |  |
| 5                                                                                   | +    | -    | +    | -    | +    | -   | -   | XIII-S  | 1 | 1.4 |  |
| 15                                                                                  | +    | -    | -    | +    | -    | -   | -   | XIV-S   | 2 | 2.7 |  |
| 74                                                                                  | +    | -    | -    | +    | -    | -   | -   |         |   |     |  |
| 45                                                                                  | +    | -    | -    | -    | -    | -   | -   | XV-S    | 1 | 1.4 |  |
| 21                                                                                  | -    | +    | -    | +    | -    | -   | -   | XVI-S   | 2 | 2.7 |  |
| 22                                                                                  | -    | +    | -    | +    | -    | -   | -   |         |   |     |  |
| 7                                                                                   | -    | +    | -    | -    | -    | -   | -   | XVII-S  | 3 | 4.1 |  |
| 17                                                                                  | -    | +    | -    | -    | -    | -   | -   |         |   |     |  |
| 39                                                                                  | -    | +    | -    | -    | -    | -   | -   |         |   |     |  |
| 68                                                                                  | -    | -    | -    | -    | -    | -   | -   | XVIII-S | 1 | 1.4 |  |
| <i>n</i>                                                                            | 68   | 65   | 62   | 36   | 23   | 4   | 1   |         |   |     |  |
| %                                                                                   | 91.9 | 87.8 | 83.8 | 48.6 | 31.1 | 5.4 | 1.4 |         |   |     |  |
| <i>lasB</i> <i>plcN</i> <i>plcH</i> <i>exoU</i> <i>nan1</i> <i>pilA</i> <i>pilB</i> |      |      |      |      |      |     |     |         |   |     |  |

(+) – presence of a particular gene; shaded boxes, (-) – absence of a particular gene.

**Table S2.** Origin and detailed distribution of the genes and genotypes with respect to antimicrobial susceptibility profiles of the multidrug-resistant *P. aeruginosa* strains included in the study ( $n = 57$ ).

| Strain number<br>( $n = 57$ ) | <i>lasB</i> | <i>plC N</i> | <i>plC H</i> | <i>exoU</i> | <i>nan1</i> | <i>pilA</i> | <i>pilB</i> | Genotype | <i>n</i> | %    |
|-------------------------------|-------------|--------------|--------------|-------------|-------------|-------------|-------------|----------|----------|------|
| 12                            | +           | +            | +            | +           | +           | +           | -           | I-R      | 1        | 1.8  |
| 10                            | +           | +            | +            | +           | +           | -           | -           | II-R     | 8        | 14.0 |
| 58                            | +           | +            | +            | +           | +           | -           | -           |          |          |      |
| 59                            | +           | +            | +            | +           | +           | -           | -           |          |          |      |
| 61                            | +           | +            | +            | +           | +           | -           | -           |          |          |      |
| 71                            | +           | +            | +            | +           | +           | -           | -           |          |          |      |
| 74                            | +           | +            | +            | +           | +           | -           | -           |          |          |      |
| 78                            | +           | +            | +            | +           | +           | -           | -           |          |          |      |
| 82                            | +           | +            | +            | +           | +           | -           | -           |          |          |      |
| 1                             | +           | +            | +            | +           | -           | -           | -           | III-R    | 20       | 35.1 |
| 7                             | +           | +            | +            | +           | -           | -           | -           |          |          |      |
| 13                            | +           | +            | +            | +           | -           | -           | -           |          |          |      |
| 14                            | +           | +            | +            | +           | -           | -           | -           |          |          |      |
| 15                            | +           | +            | +            | +           | -           | -           | -           |          |          |      |
| 18                            | +           | +            | +            | +           | -           | -           | -           |          |          |      |
| 20                            | +           | +            | +            | +           | -           | -           | -           |          |          |      |
| 27                            | +           | +            | +            | +           | -           | -           | -           |          |          |      |
| 29                            | +           | +            | +            | +           | -           | -           | -           |          |          |      |
| 34                            | +           | +            | +            | +           | -           | -           | -           |          |          |      |
| 51                            | +           | +            | +            | +           | -           | -           | -           |          |          |      |
| 63                            | +           | +            | +            | +           | -           | -           | -           |          |          |      |
| 64                            | +           | +            | +            | +           | -           | -           | -           |          |          |      |
| 65                            | +           | +            | +            | +           | -           | -           | -           |          |          |      |
| 66                            | +           | +            | +            | +           | -           | -           | -           |          |          |      |
| 68                            | +           | +            | +            | +           | -           | -           | -           |          |          |      |
| 79                            | +           | +            | +            | +           | -           | -           | -           |          |          |      |
| 81                            | +           | +            | +            | +           | -           | -           | -           |          |          |      |
| 84                            | +           | +            | +            | +           | -           | -           | -           |          |          |      |
| 85                            | +           | +            | +            | +           | -           | -           | -           |          |          |      |
| 6                             | +           | +            | +            | -           | +           | +           | +           | IV-R     | 1        | 1.8  |
| 35                            | +           | +            | +            | -           | +           | -           | -           | V-R      | 5        | 8.8  |
| 37                            | +           | +            | +            | -           | +           | -           | -           |          |          |      |
| 41                            | +           | +            | +            | -           | +           | -           | -           |          |          |      |
| 50                            | +           | +            | +            | -           | +           | -           | -           |          |          |      |
| 70                            | +           | +            | +            | -           | +           | -           | -           |          |          |      |
| 21                            | +           | +            | +            | -           | -           | +           | -           | VI-R     | 1        | 1.8  |
| 3                             | +           | +            | +            | -           | -           | -           | -           | VII-R    | 19       | 33.3 |
| 4                             | +           | +            | +            | -           | -           | -           | -           |          |          |      |
| 5                             | +           | +            | +            | -           | -           | -           | -           |          |          |      |
| 9                             | +           | +            | +            | -           | -           | -           | -           |          |          |      |
| 16                            | +           | +            | +            | -           | -           | -           | -           |          |          |      |
| 17                            | +           | +            | +            | -           | -           | -           | -           |          |          |      |
| 24                            | +           | +            | +            | -           | -           | -           | -           |          |          |      |
| 26                            | +           | +            | +            | -           | -           | -           | -           |          |          |      |
| 28                            | +           | +            | +            | -           | -           | -           | -           |          |          |      |
| 30                            | +           | +            | +            | -           | -           | -           | -           |          |          |      |

|          |             |              |              |             |             |             |             |        |   |     |  |
|----------|-------------|--------------|--------------|-------------|-------------|-------------|-------------|--------|---|-----|--|
| 31       | +           | +            | +            | -           | -           | -           | -           |        |   |     |  |
| 32       | +           | +            | +            | -           | -           | -           | -           |        |   |     |  |
| 46       | +           | +            | +            | -           | -           | -           | -           |        |   |     |  |
| 47       | +           | +            | +            | -           | -           | -           | -           |        |   |     |  |
| 53       | +           | +            | +            | -           | -           | -           | -           |        |   |     |  |
| 54       | +           | +            | +            | -           | -           | -           | -           |        |   |     |  |
| 56       | +           | +            | +            | -           | -           | -           | -           |        |   |     |  |
| 60       | +           | +            | +            | -           | -           | -           | -           |        |   |     |  |
| 77       | +           | +            | +            | -           | -           | -           | -           |        |   |     |  |
| 2        | +           | +            | -            | +           | +           | -           | -           | VIII-R | 1 | 1.8 |  |
| 52       | +           | +            | -            | -           | -           | -           | -           | IX-R   | 1 | 1.8 |  |
| <i>n</i> | 57          | 57           | 55           | 30          | 16          | 3           | 1           |        |   |     |  |
| %        | 100.0       | 100.0        | 96.5         | 52.6        | 28.1        | 5.3         | 1.8         |        |   |     |  |
|          | <i>lasB</i> | <i>plC N</i> | <i>plC H</i> | <i>exoU</i> | <i>nan1</i> | <i>pilA</i> | <i>pilB</i> |        |   |     |  |

(+) – presence of a particular gene; shaded boxes, (-) – absence of a particular gene

**Table S3.** The Spearman's rank correlation coefficient for the particular genes pair with respect to antimicrobial susceptibility profiles of *P. aeruginosa* strains included into the study

(types of correlation:  $r > 0$  positive correlation,  $r = 0$  lack of correlation,  $r < 0$  negative correlation; the strength of relation:  $< 0.2$  – lack of relation,  $0.2-0.4$  – weak,  $0.4-0.7$  – moderate,  $0.7-0.9$  – quite strong  $> 0.9$  – very strong; the statistically significant differences are marked in red)

| MDR (n = 57) | <i>plC H</i> | <i>exoU</i> | <i>nan1</i> | <i>pilA</i>     | <i>pilB</i>     |
|--------------|--------------|-------------|-------------|-----------------|-----------------|
| <i>plC H</i> | 1.000000     | 0.010050    | -0.093066   | 0.044947        | 0.025482        |
| <i>exoU</i>  | 0.010050     | 1.000000    | 0.123466    | -0.091099       | -0.140859       |
| <i>nan1</i>  | -0.093066    | 0.123466    | 1.000000    | 0.202458        | 0.213913        |
| <i>pilA</i>  | 0.044947     | -0.091099   | 0.202458    | 1.000000        | <b>0.566947</b> |
| <i>pilB</i>  | 0.025482     | -0.140859   | 0.213913    | <b>0.566947</b> | 1.000000        |

| MDS (n = 74) | <i>lasB</i>     | <i>plC N</i>    | <i>plC H</i>    | <i>exoU</i>      | <i>nan1</i> | <i>pilA</i>      | <i>pilB</i> |
|--------------|-----------------|-----------------|-----------------|------------------|-------------|------------------|-------------|
| <i>lasB</i>  | 1.000000        | 0.040938        | <b>0.675191</b> | 0.091020         | 0.199480    | 0.071007         | 0.034766    |
| <i>plC N</i> | 0.040938        | 1.000000        | <b>0.284966</b> | -0.051421        | -0.107439   | -0.093892        | 0.043552    |
| <i>plC H</i> | <b>0.675191</b> | <b>0.284966</b> | 1.000000        | -0.085245        | 0.216230    | 0.105166         | 0.051491    |
| <i>exoU</i>  | 0.091020        | -0.051421       | -0.085245       | 1.000000         | 0.164199    | <b>-0.232670</b> | 0.120248    |
| <i>nan1</i>  | 0.199480        | -0.107439       | 0.216230        | 0.164199         | 1.000000    | 0.097715         | 0.174285    |
| <i>pilA</i>  | 0.071007        | -0.093892       | 0.105166        | <b>-0.232670</b> | 0.097715    | 1.000000         | -0.027978   |
| <i>pilB</i>  | 0.034766        | 0.043552        | 0.051491        | 0.120248         | 0.174285    | -0.027978        | 1.000000    |

| MDS+MDR (n = 131) | <i>lasB</i>     | <i>plC N</i>    | <i>plC H</i>    | <i>exoU</i> | <i>nan1</i>     | <i>pilA</i>     | <i>pilB</i>     |
|-------------------|-----------------|-----------------|-----------------|-------------|-----------------|-----------------|-----------------|
| <i>lasB</i>       | 1.000000        | 0.084851        | <b>0.633358</b> | 0.074704    | 0.142646        | 0.052055        | 0.027280        |
| <i>plC N</i>      | 0.084851        | 1.000000        | <b>0.296773</b> | -0.028106   | -0.087160       | -0.069654       | 0.033819        |
| <i>plC H</i>      | <b>0.633358</b> | <b>0.296773</b> | 1.000000        | -0.046777   | 0.117148        | 0.082188        | 0.043072        |
| <i>exoU</i>       | 0.074704        | -0.028106       | -0.046777       | 1.000000    | 0.145285        | -0.171530       | -0.000951       |
| <i>nan1</i>       | 0.142646        | -0.087160       | 0.117148        | 0.145285    | 1.000000        | 0.142229        | <b>0.191241</b> |
| <i>pilA</i>       | 0.052055        | -0.069654       | 0.082188        | -0.171530   | 0.142229        | 1.000000        | <b>0.247239</b> |
| <i>pilB</i>       | 0.027280        | 0.033819        | 0.043072        | -0.000951   | <b>0.191241</b> | <b>0.247239</b> | 1.000000        |

**Figures S1-S7.** Pictures of the electrophoretic gels showing the amplicons of PCR for the corresponding genes investigated in the present study

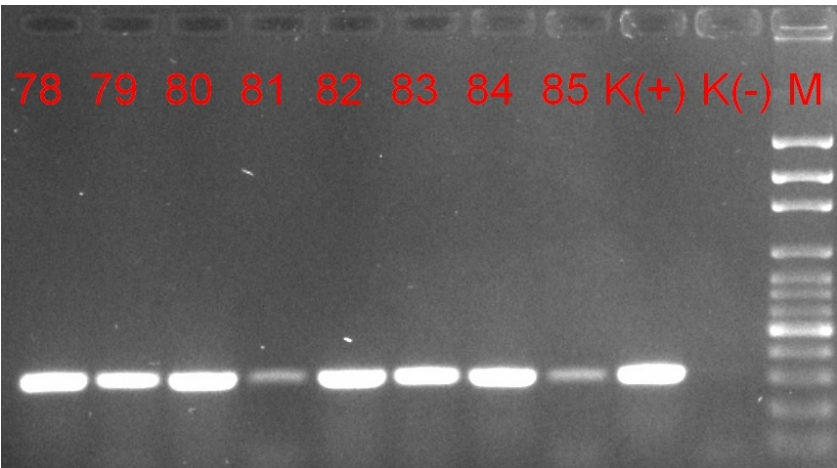

Figure S1 – *lasB* gene (300 bp); M – DNA size marker of 100-3000 bp; numbers – names assigned to a particular strain; K(+) – positive PCR control; K(-) – negative PCR control

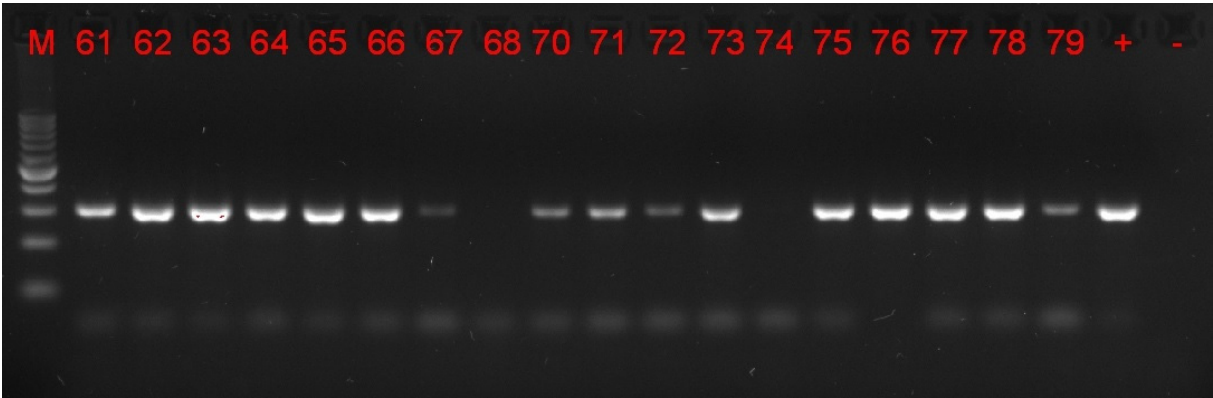

Figure S2 – *plC H* gene (307 bp); M – DNA size marker of 100-1000 bp; numbers – names assigned to a particular strain; (+) – positive PCR control; (-) – negative PCR control

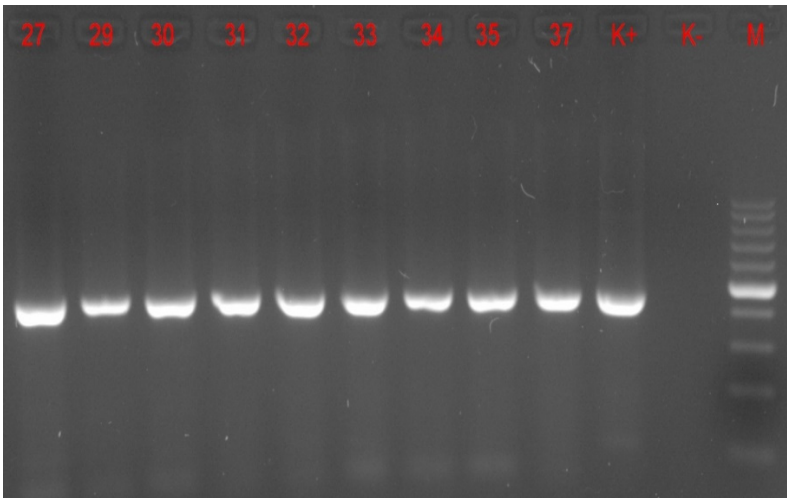

Figure S3 – *plC N* gene (466 bp); M – DNA size marker of 100-1000 bp; numbers – names assigned to a particular strain; K(+) – positive PCR control; K(-) – negative PCR control

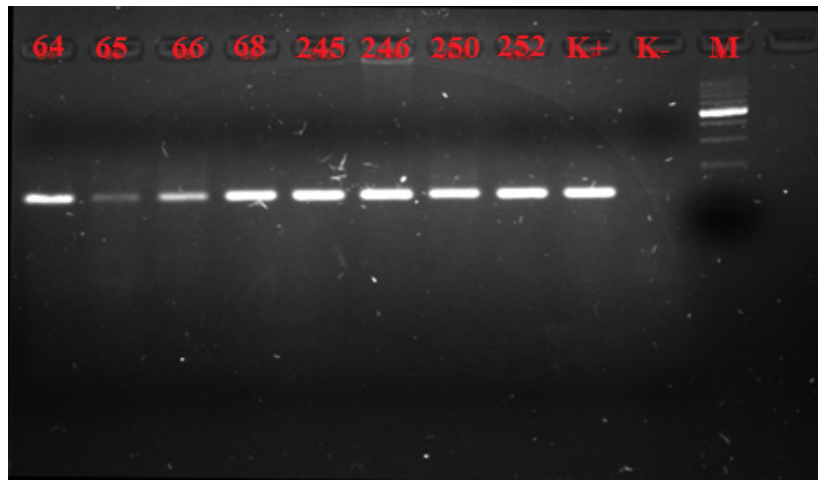

Figure S4 – *exoU* gene (134 bp); M – DNA size marker of 100-1000 bp; numbers – names assigned to a particular strain; K(+) – positive PCR control; K(-) – negative PCR control

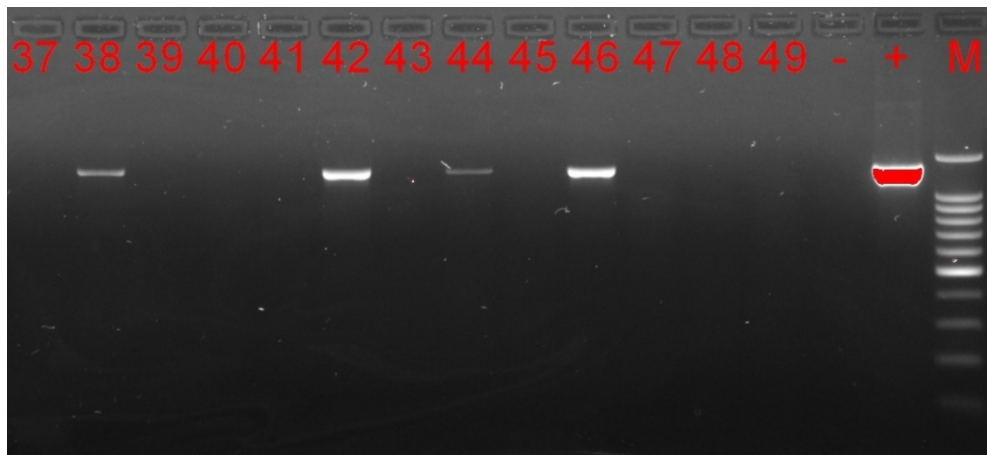

Figure S5 – *nan1* gene (1316 bp); M – DNA size marker of 100-1500 bp; numbers – names assigned to a particular strain; (+) – positive PCR control; (-) – negative PCR control

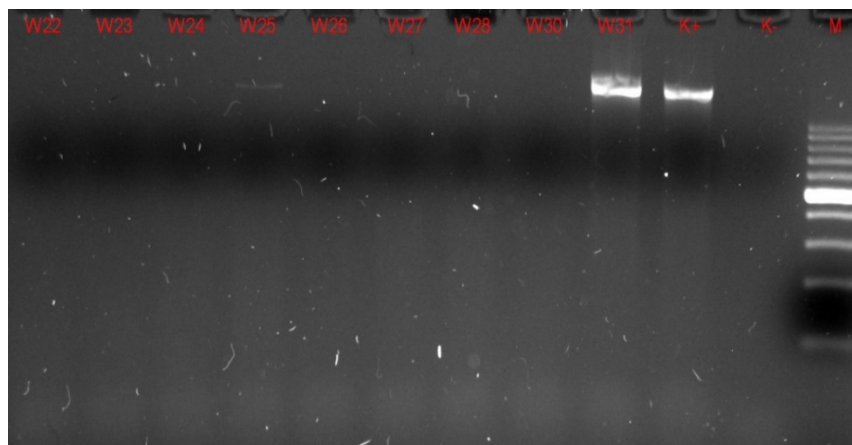

Figure S6 – *pilA* gene (1675 bp); M – DNA size marker of 100-1000 bp; “W”+numbers – names assigned to a particular strain; K(+) – positive PCR control; K(-) – negative PCR control



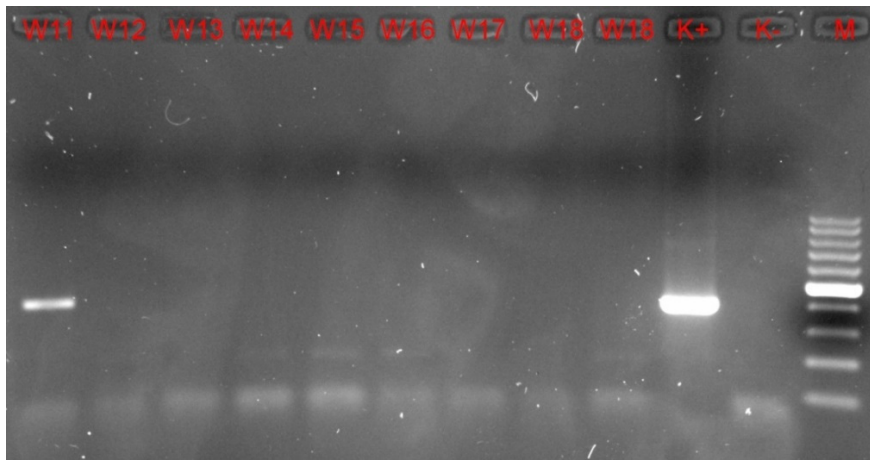

Figure S7 – *pilB* gene (408 bp); M – DNA size marker of 100-1000 bp; “W”+numbers – names assigned to a particular strain; K(+) – positive PCR control; K(-) – negative PCR control
